# Supplementary material for: Next Generation of Ovarian Cancer Detection Using Aptamers
Source: MDPI journal article supplement (doi:10.3390/ijms24076315), 2023-03-28
Supplement: s1 [file s1]

**Table S1.** Relation of membrane proteins selected as potential targets for aptamers in Caov-3 cells.

| <b>Protein</b>                                        | <b>Gene</b> | <b>Uniprot ID</b> | <b>Uniprot Cell Location</b> | <b>PSORT Cell Location</b> | <b>Transmembrane Domain</b> | <b>Topology Membrane*</b> |
|-------------------------------------------------------|-------------|-------------------|------------------------------|----------------------------|-----------------------------|---------------------------|
| Secreted and transmembrane protein 1                  | SECTM1      | Q8WVN6            | Plasma membrane              | Endoplasmic reticulum      | 1                           | 1a                        |
| Integrin beta-4                                       | ITGB4       | P16144            | Plasma membrane              | Extracellular region       | 1                           | 1a                        |
| MHC class I polypeptide -related sequence B           | MICB        | Q29980            | Plasma membrane              | Endoplasmic reticulum      | 1                           | 1a                        |
| Oxidized low-density lipoprotein receptor 1           | OLR1        | P78380            | Plasma membrane              | Nucleus                    | 1                           | 2                         |
| Intercellular adhesion molecule 2                     | ICAM2       | P13598            | Plasma membrane              | Golgi Complex              | 1                           | 1a                        |
| Receptor-transporting protein 4                       | RTP4        | Q96DX8            | Plasma membrane              | Cytoplasm                  | 1                           | Nt                        |
| HLA class I histocompatibility antigen, alpha chain F | HLA-F       | P30511            | Plasma membrane              | Endoplasmic reticulum      | 1                           | 1a                        |
| Integrin beta-2                                       | ITGB2       | P05107            | Plasma membrane              | Endoplasmic reticulum      | 1                           | 1a                        |
| Low-density lipoprotein receptor-related protein 8    | LRP8        | Q14114            | Plasma membrane              | Extracellular region       | 1                           | 1a                        |

|                                                        |                |               |                        |                              |          |           |
|--------------------------------------------------------|----------------|---------------|------------------------|------------------------------|----------|-----------|
| <b>FXD domain-containing ion transport regulator 3</b> | <b>FXD3</b>    | <b>Q14802</b> | <b>Plasma membrane</b> | <b>Endoplasmic reticulum</b> | <b>1</b> | <b>1a</b> |
| <b>Protein NDRG4</b>                                   | <b>NDRG4</b>   | <b>Q9ULP0</b> | <b>Plasma membrane</b> | <b>Endoplasmic reticulum</b> | <b>1</b> | <b>2</b>  |
| <b>Inactive Rhomboid protein 2</b>                     | <b>RHBDF2</b>  | <b>Q6PJF5</b> | <b>Plasma membrane</b> | <b>Plasma membrane</b>       | <b>7</b> | <b>3b</b> |
| <b>Filamin-A</b>                                       | <b>FLNA</b>    | <b>P21333</b> | <b>Plasma membrane</b> | <b>Endoplasmic reticulum</b> | <b>1</b> | <b>2</b>  |
| <b>Alkaline phosphatase, placental type</b>            | <b>ALPP</b>    | <b>P05187</b> | <b>Plasma membrane</b> | <b>Plasma membrane</b>       | <b>1</b> | <b>1a</b> |
| <b>Cadherin-5</b>                                      | <b>CDH5</b>    | <b>P33151</b> | <b>Plasma membrane</b> | <b>Endoplasmic reticulum</b> | <b>1</b> | <b>1a</b> |
| <b>Acid sphingomyelinase-like phosphodiesterase 3b</b> | <b>SMPDL3B</b> | <b>Q92485</b> | <b>Plasma membrane</b> | <b>Plasma membrane</b>       | <b>1</b> | <b>1a</b> |
| <b>Sushi domain-containing protein 2</b>               | <b>SUSD2</b>   | <b>Q9UGT4</b> | <b>Plasma membrane</b> | <b>Plasma membrane</b>       | <b>1</b> | <b>1a</b> |
| <b>Metalloreductase STEAP4</b>                         | <b>STEAP4</b>  | <b>Q687X5</b> | <b>Plasma membrane</b> | <b>Endoplasmic reticulum</b> | <b>5</b> | <b>3a</b> |
| <b>Neuronal cell adhesion molecule</b>                 | <b>NRCAM</b>   | <b>Q92823</b> | <b>Plasma membrane</b> | <b>Cytoplasm</b>             | <b>1</b> | <b>Nt</b> |
| <b>Suppressor of tumorigenicity 14 protein</b>         | <b>ST14</b>    | <b>Q9Y5Y6</b> | <b>Plasma membrane</b> | <b>Mitochondria</b>          | <b>1</b> | <b>2</b>  |

|                                                           |               |               |                            |                                  |          |           |
|-----------------------------------------------------------|---------------|---------------|----------------------------|----------------------------------|----------|-----------|
| <b>Claudin-7</b>                                          | <b>CLDN7</b>  | <b>O95471</b> | <b>Plasma<br/>membrane</b> | <b>Endoplasmic<br/>reticulum</b> | <b>3</b> | <b>3a</b> |
| <b>Ferric-<br/>chelate<br/>reductase 1</b>                | <b>FRRS1</b>  | <b>Q6ZNA5</b> | <b>Plasma<br/>membrane</b> | <b>Plasma<br/>membrane</b>       | <b>6</b> | <b>3b</b> |
| <b>Adhesion<br/>G-protein<br/>coupled<br/>receptor G1</b> | <b>GPR56</b>  | <b>Q9Y653</b> | <b>Plasma<br/>membrane</b> | <b>Plasma<br/>membrane</b>       | <b>8</b> | <b>3b</b> |
| <b>Excitatory<br/>amino acid<br/>transporter<br/>1</b>    | <b>SLC1A3</b> | <b>P43003</b> | <b>Plasma<br/>membrane</b> | <b>Plasma<br/>membrane</b>       | <b>9</b> | <b>3b</b> |
| <b>Immunoglo-<br/>bulin<br/>superfamily<br/>member 3</b>  | <b>IGSF3</b>  | <b>O75054</b> | <b>Plasma<br/>membrane</b> | <b>Plasma<br/>membrane</b>       | <b>1</b> | <b>1a</b> |
| <b>Mesothelin</b>                                         | <b>MSLN</b>   | <b>Q13421</b> | <b>Plasma<br/>membrane</b> | <b>Plasma<br/>membrane</b>       | <b>1</b> | <b>1a</b> |

\* Membrane topology: (1a) a cleavable signal sequence and one transmembrane segment, (2) N-terminal portion inserted in the cytoplasmic region, (Nt) uncleavable signal peptide and one transmembrane segment near its C-terminus, (3a) multiple transmembrane regions with its N-terminus facing the cytosolic side, (3b) multiple transmembrane regions with its N-terminus facing the cytosolic side.

**Table S2.** Relation of membrane proteins selected as potential targets for aptamers in Ovar-3 cells.

| <b>Protein</b>                                       | <b>Gene</b>    | <b>Uniprot<br/>ID</b> | <b>Uniprot<br/>Cell<br/>Location</b> | <b>PSORT Cell<br/>Location</b>   | <b>Transmembrane<br/>Domain</b> | <b>Topology<br/>Membrane*</b> |
|------------------------------------------------------|----------------|-----------------------|--------------------------------------|----------------------------------|---------------------------------|-------------------------------|
| <b>Claudin-6</b>                                     | <b>CLDN6</b>   | <b>P56747</b>         | <b>Plasma<br/>membrane</b>           | <b>Endoplasmic<br/>reticulum</b> | <b>4</b>                        | <b>3a</b>                     |
| <b>Transmembrane<br/>protein 100</b>                 | <b>TMEM100</b> | <b>Q9NV29</b>         | <b>Plasma<br/>membrane</b>           | <b>Endoplasmic<br/>reticulum</b> | <b>3</b>                        | <b>3a</b>                     |
| <b>Very low-density<br/>lipoprotein<br/>receptor</b> | <b>VLDLR</b>   | <b>P98155</b>         | <b>Plasma<br/>membrane</b>           | <b>Extracellular<br/>region</b>  | <b>1</b>                        | <b>1a</b>                     |

|                                                              |          |         |                 |                       |   |    |
|--------------------------------------------------------------|----------|---------|-----------------|-----------------------|---|----|
| <b>Sphingomyelin phosphodiesterase 2</b>                     | SMPD2    | O60906  | Plasma membrane | Endoplasmic reticulum | 1 | 2  |
| <b>Heat shock protein HSP 90-beta</b>                        | HSP90AB1 | P08238  | Plasma membrane | Cytoplasm             | 1 | Nt |
| <b>Matrix metalloproteinase-15</b>                           | MMP15    | P51511  | Plasma membrane | Endoplasmic reticulum | 1 | 1a |
| <b>Atrial natriuretic peptide receptor 3</b>                 | NPR3     | P17342  | Plasma membrane | Golgi Complex         | 1 | 1a |
| <b>HLA class I histocompatibility antigen, A alpha chain</b> | HLA-A    | P004439 | Plasma membrane | Endoplasmic reticulum | 1 | 1a |
| <b>MANSC domain-containing protein 1</b>                     | MANSC1   | Q9H8J5  | Plasma membrane | Cytoplasm             | 1 | Nt |
| <b>Protein jagged-1</b>                                      | JAG1     | P78504  | Plasma membrane | Endoplasmic reticulum | 2 | 3a |
| <b>Killer cell lectin-like receptor subfamily G member 2</b> | KLRG2    | A4D1S0  | Plasma membrane | Nucleus               | 1 | 2  |
| <b>Uroplakin-1b</b>                                          | UPK1B    | O75841  | Plasma membrane | Plasma membrane       | 4 | 3a |
| <b>Ephrin type-A receptor 1</b>                              | EPHA1    | P21709  | Plasma membrane | Endoplasmic reticulum | 1 | 1a |
| <b>Neuronal cell adhesion molecule</b>                       | NRCAM    | Q92823  | Plasma membrane | Cytoplasm             | 1 | Nt |
| <b>Suppressor of tumorigenicity 14 protein</b>               | ST14     | Q9Y5Y6  | Plasma membrane | Mitochondria          | 1 | 2  |

|                                               |         |        |                 |                       |   |    |
|-----------------------------------------------|---------|--------|-----------------|-----------------------|---|----|
| <b>Transmembrane channel-like protein 4</b>   | TMC4    | Q7Z404 | Plasma membrane | Plasma membrane       | 8 | 3a |
| <b>Claudin-7</b>                              | CLDN7   | O95471 | Plasma membrane | Endoplasmic reticulum | 3 | 3a |
| <b>Transmembrane protein 100</b>              | TMEM100 | Q9NV29 | Plasma membrane | Endoplasmic reticulum | 3 | 3a |
| <b>Tetraspanin-15</b>                         | TSPAN15 | O95858 | Plasma membrane | Endoplasmic reticulum | 4 | 3a |
| <b>Adhesion G-protein coupled receptor G1</b> | GPR56   | Q9Y653 | Plasma membrane | Plasma membrane       | 8 | 3b |
| <b>Immunoglobulin superfamily member 3</b>    | IGSF3   | O75054 | Plasma membrane | Plasma membrane       | 1 | 1a |
| <b>Uroplakin-3b</b>                           | UPK3B   | Q9BT76 | Plasma membrane | Extracellular region  | 0 | -  |
| <b>Leukocyte surface antigen CD47</b>         | CD47    | Q08722 | Plasma membrane | Endoplasmic reticulum | 5 | 3a |
| <b>Mesothelin</b>                             | MSLN    | Q13421 | Plasma membrane | Plasma membrane       | 1 | 1a |

\* Membrane topology: (1a) a cleavable signal sequence and one transmembrane segment, (2) N-terminal portion inserted in the cytoplasmic region, (Nt) uncleavable signal peptide and one transmembrane segment near its C-terminus, (3a) multiple transmembrane regions with its N-terminus facing the cytosolic side.
